# Supplementary material for: Hydrogels from amphiphilic star block copolypeptides
Source: Royal Society of Chemistry journal article supplement (doi:10.1039/c6ra01190j), 2016-01-01
Supplement: c6ra01190j1.pdf [file c6ra01190j1.pdf]

## Electronic Supporting Information

### Hydrogels from Amphiphilic Star Block Copolypeptides

R. Murphy,<sup>a,b</sup> T. Borase,<sup>a</sup> C. Payne,<sup>c</sup> J. O'Dwyer,<sup>c</sup> S.-A. Cryan,<sup>c,d,e</sup> A. Heise<sup>a,b\*</sup>

<sup>a</sup>Polymer Chemistry and Biopolymers Laboratory, Department of Pharmaceutical and Medicinal Chemistry, Royal College of Surgeons in Ireland, Dublin 2, Ireland.

<sup>b</sup>School of Chemical Sciences, Dublin City University, Dublin 9, Ireland.

<sup>c</sup>School of Pharmacy, Royal College of Surgeons in Ireland, Dublin 2, Ireland.

<sup>d</sup>Tissue Engineering Research Group, Royal College of Surgeons in Ireland.

<sup>e</sup>Trinity Centre for Bioengineering, Trinity College Dublin, Dublin 2

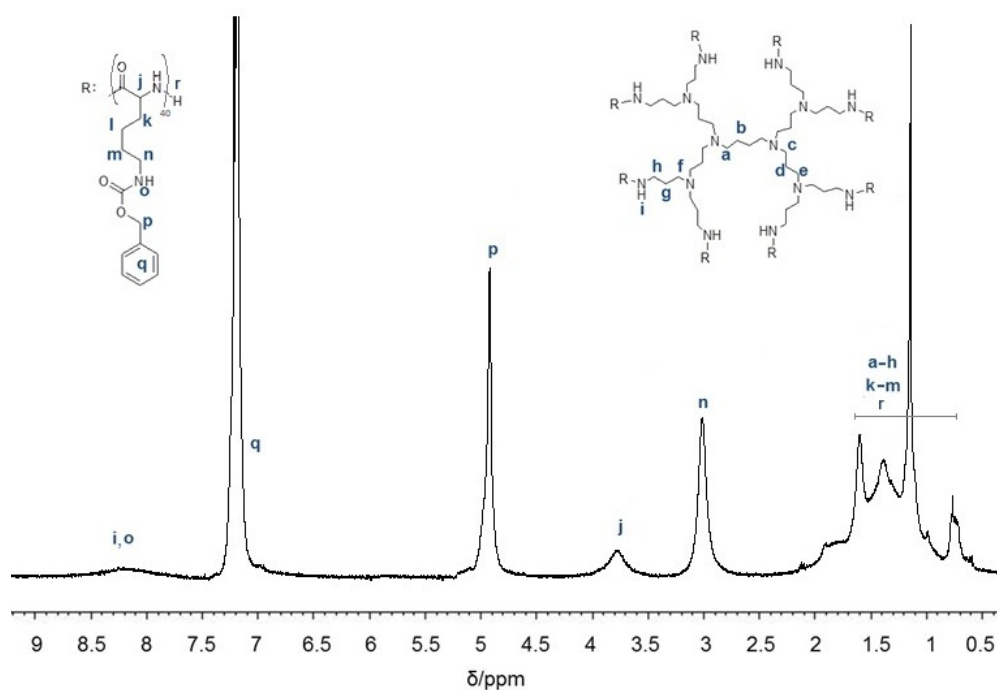

Figure S1. <sup>1</sup>H-NMR spectrum of 8-PZLL<sub>40</sub> (CDCl<sub>3</sub>).

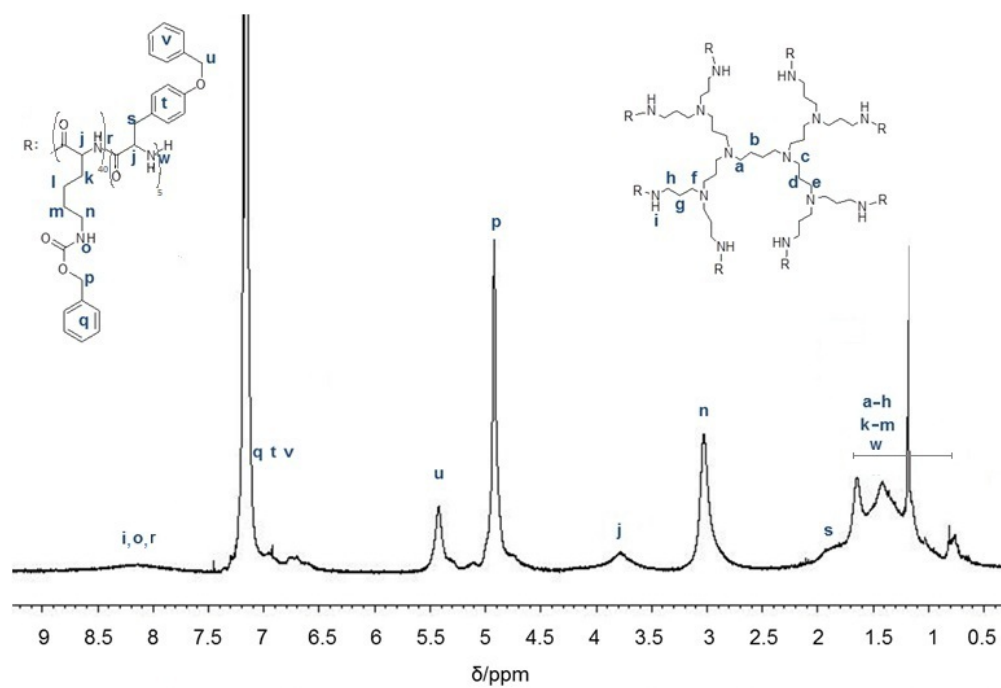

Figure S2.  $^1\text{H-NMR}$  spectrum of 8-PZLL<sub>40</sub>-*b*-PBLT<sub>5</sub> ( $\text{CDCl}_3$ ).

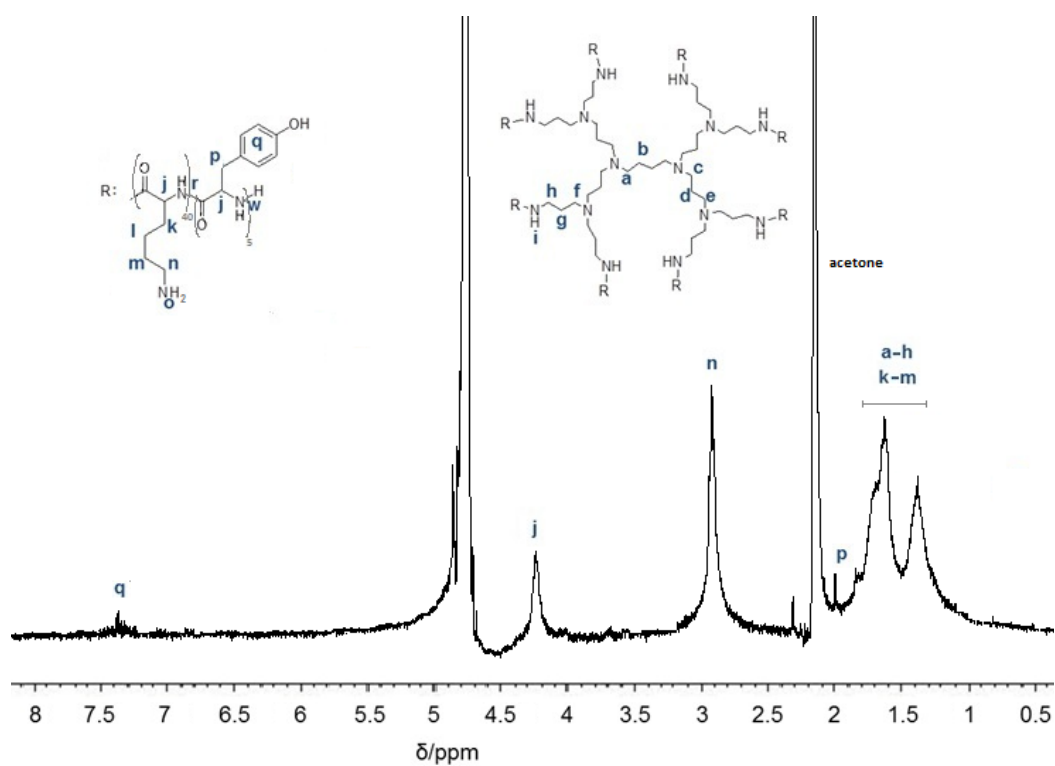

Figure S3.  $^1\text{H-NMR}$  spectrum of 8-PLL<sub>40</sub>-*b*-PLT<sub>5</sub> ( $\text{D}_2\text{O}$ ).

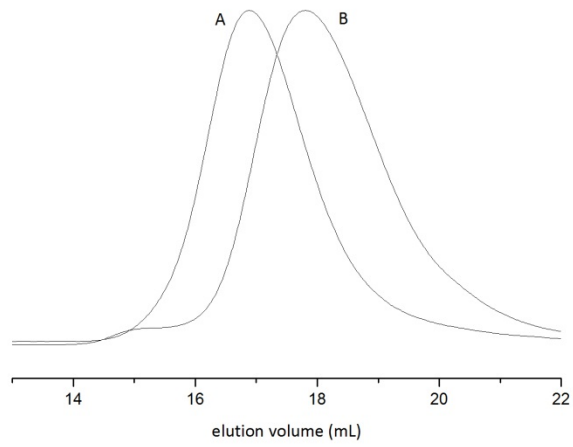

Figure S4: SEC trace of; 8-PZLL<sub>40</sub>-b-PLA<sub>5</sub> (A) and 8-PZLL<sub>40</sub> (B).

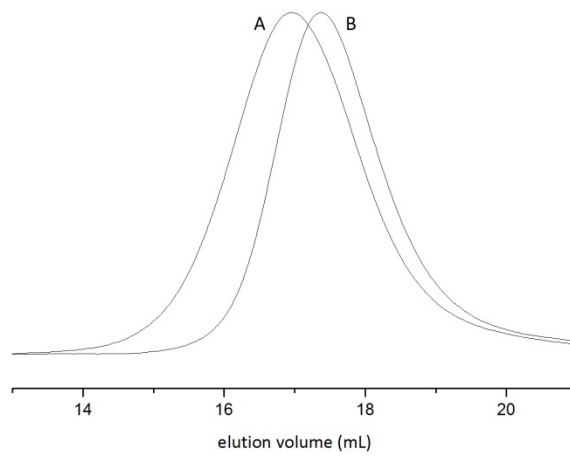

Figure S5: SEC trace of; 8-PZLL<sub>40</sub>-b-PLT<sub>5</sub> (A) and 8-PZLL<sub>40</sub> (B).

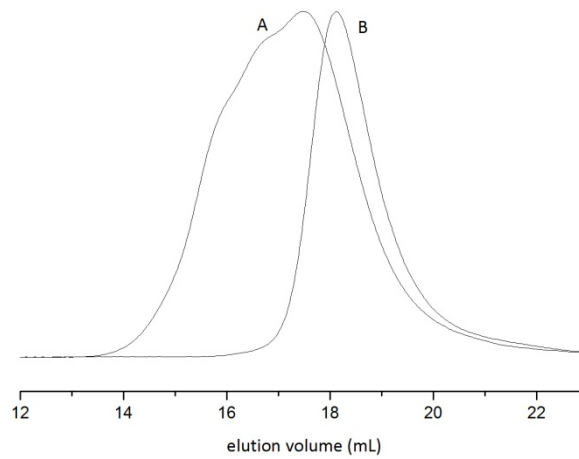

Figure S6: SEC trace of; 1-PZLL<sub>148</sub>-b-PBLT<sub>30</sub> (A) and 1-PZLL<sub>148</sub> (B).

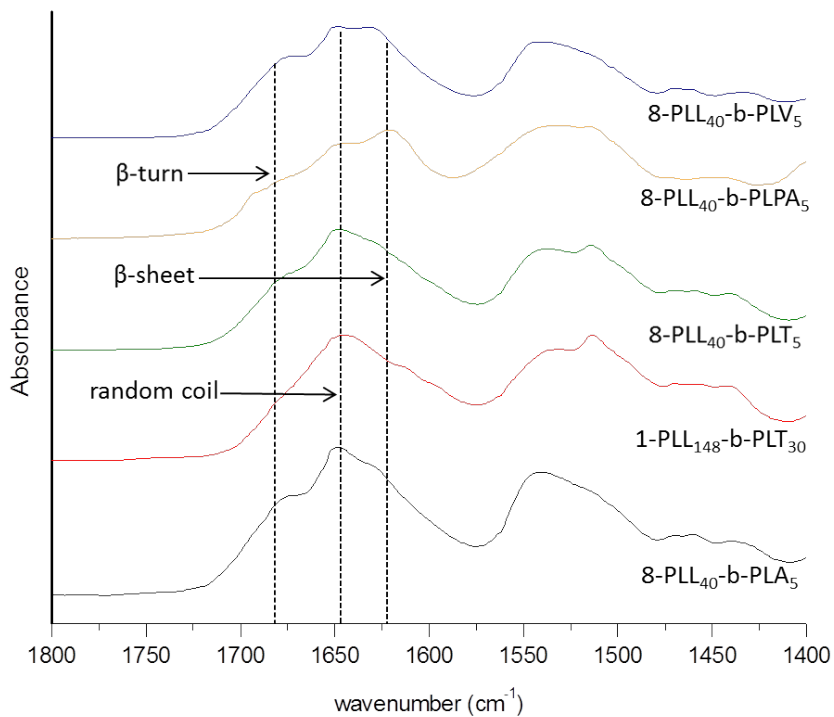

Figure S7: FT-IR spectra with assigned amide bands.

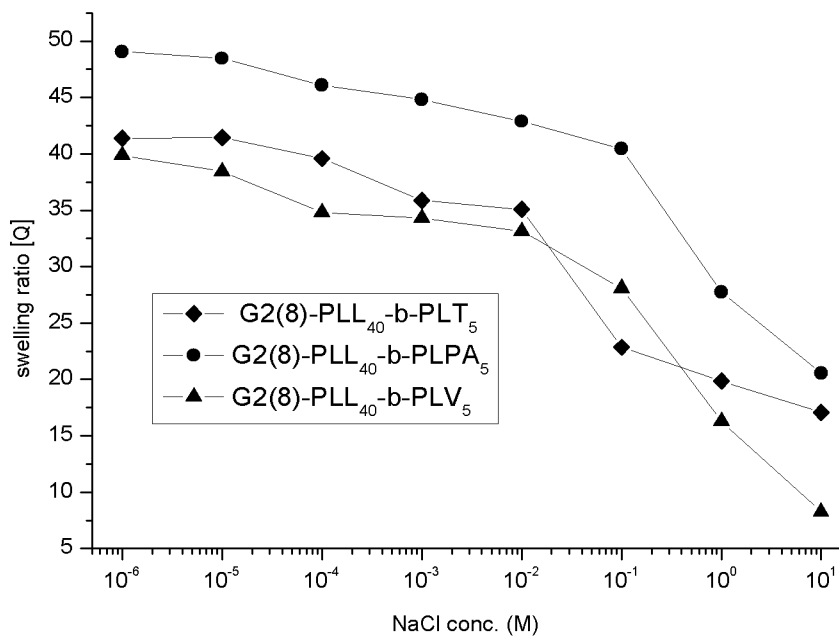

Figure S8: Swelling ratio of star diblock copolypeptides (3.0 wt.%) as a function of increasing ionic concentration.

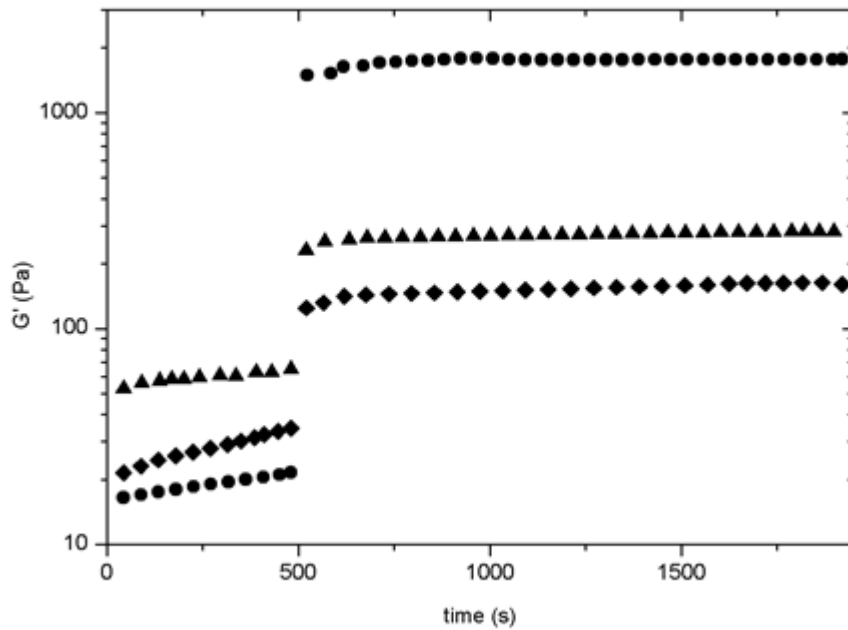

Figure S9: Strain based recovery of gel strength [sheared at  $\gamma = 1$ ,  $\omega = 6 \text{ rad s}^{-1}$  for 8 mins before switching shear to  $\gamma = 0.1$ ,  $\omega = 6 \text{ rad s}^{-1}$  for 24 mins]. 8-PLL<sub>40</sub>-b-PLPA<sub>5</sub> (●), 8-PLL<sub>40</sub>-b-PLV<sub>5</sub> (▲), 8-PLL<sub>40</sub>-b-PLT<sub>5</sub> (◆).

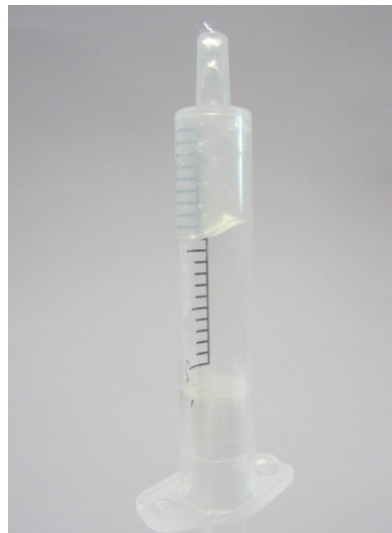

Figure S10: Image of 8-PLL<sub>40</sub>-b-PLPA<sub>5</sub> hydrogel loaded in a syringe.

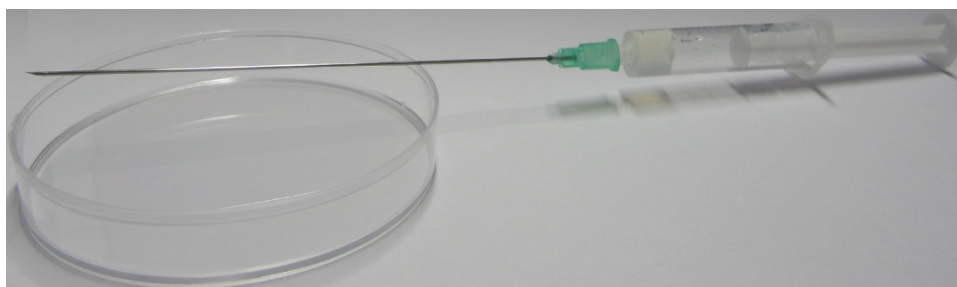

Figure S11: Image of 8-PLL<sub>40</sub>-b-PLPA<sub>5</sub> with in a syringe with a 21G needle attached.

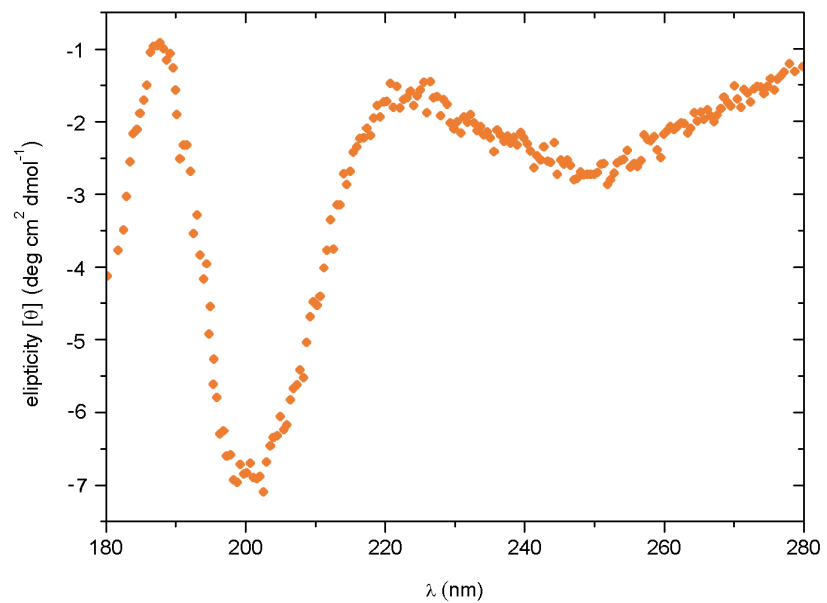

Figure S12: Circular dichroism (CD) spectrum of 8-arm PLL in water.
